# Supplementary material for: Heterogeneity of Treatment Effects of Hydrocortisone by Risk of Bronchopulmonary Dysplasia or Death Among Extremely Preterm Infants in the National Institute of Child Health and Human Development Neonatal Research Network Trial: A Secondary Analysis of a Randomized Clinical Trial
Source: PubMed Central journal article supplement (PMC10233424; doi:10.1001/jamanetworkopen.2023.15315), 2023-05-31
Supplement: jamanetwopen-e2315315-s002.pdf [file jamanetwopen-e2315315-s002.pdf]

## Supplementary Online Content

Gentle JS, Rysavy MA, Li L, et al; National Institute of Child Health and Human Development Neonatal Research Network. Heterogeneity of treatment effects of hydrocortisone by risk of bronchopulmonary dysplasia or death among extremely preterm infants in the National Institute of Child Health and Human Development Neonatal Research Network Trial: a secondary analysis of a randomized clinical trial. *JAMA Netw Open*. 2023;6(5):e2315315. doi:10.1001/jamanetworkopen.2023.15315

**eTable 1.** Demographic and Clinical Characteristics Used for Risk Estimates by Quartile of Baseline Risk for Grades 2 to 3 BPD or Death and Exposure Group

**eTable 2.** Additional Clinical Characteristics by Quartile of Baseline Risk for Grades 2 to 3 BPD or Death

**eTable 3.** Additional Clinical Characteristics by Quartile of Baseline Risk for Grades 2 to 3 BPD or Death and Exposure Group

**eFigure 1.** CONSORT Flow Diagram

**eFigure 2.** Distribution of Predicted Probability of Grades 2 to 3 BPD or Death in the Enrolled Population

**eFigure 3.** Calibration Plot of Association of Estimated Probability of Grades 2 to 3 BPD or Death to the Observed Outcome of Grades 2 to 3 BPD or Death

This supplementary material has been provided by the authors to give readers additional information about their work.

**eTable 1.** Demographic and Clinical Characteristics Used for Risk Estimates by Quartile of Baseline Risk for Grades 2 to 3 BPD or Death and Exposure Group

|                                                     | Quartile 1<br>18-45% |                  | Quartile 2<br>46-53% |                  | Quartile 3<br>54-65% |                  | Quartile 4<br>66-84% |                  | All             |                  |
|-----------------------------------------------------|----------------------|------------------|----------------------|------------------|----------------------|------------------|----------------------|------------------|-----------------|------------------|
|                                                     | HC<br>n=110          | Placebo<br>n=89  | HC<br>n=89           | Placebo<br>n=111 | HC<br>n=99           | Placebo<br>n=101 | HC<br>n=100          | Placebo<br>n=100 | HC<br>n=398     | Placebo<br>n=401 |
| Gestational age (wks)<br>median (IQR)               | 25<br>(24-26)        | 25<br>(24-26)    | 25<br>(24-25)        | 25<br>(24-26)    | 24<br>(24-26)        | 25<br>(24-26)    | 25<br>(24-26)        | 25<br>(24-26)    | 25<br>(24-26)   | 25<br>(24-26)    |
| Birth weight (g)<br>median (IQR)                    | 773<br>(660-860)     | 848<br>(720-984) | 700<br>(611-789)     | 730<br>(621-790) | 665<br>(580-770)     | 670<br>(585-770) | 633<br>(540-710)     | 630<br>(520-710) | 690 (600-799)   | 695 (600-810)    |
| Male: n/N (%)                                       | 26/110 (24)          | 32/89<br>(36)    | 47/89<br>(53)        | 72/111<br>(65)   | 55/99<br>(56)        | 66/101<br>(65)   | 58/100<br>(58)       | 65/100<br>(65)   | 186/398<br>(47) | 235/401<br>(59)  |
| Highest FiO <sub>2</sub> on Day 14:<br>median (IQR) | 36<br>(30-44)        | 35<br>(30-41)    | 46<br>(38-55)        | 38<br>(32-50)    | 48<br>(38-62)        | 48<br>(36-60)    | 60<br>(50-80)        | 60<br>(45-76)    | 46<br>(35-62)   | 44<br>(34-60)    |
| Respiratory support on<br>postnatal day 14:         |                      |                  |                      |                  |                      |                  |                      |                  |                 |                  |
| Conventional<br>Ventilation                         | 2 (2)                | 2 (2)            | 7 (8)                | 6 (5)            | 39 (39)              | 29 (29)          | 83 (83)              | 82 (82)          | 131 (33)        | 119 (30)         |
| High frequency<br>ventilation                       | 106 (96)             | 87 (98)          | 82 (92)              | 105 (95)         | 60 (61)              | 72 (71)          | 17 (17)              | 18 (18)          | 265 (67)        | 282 (70)         |
| Noninvasive positive<br>pressure ventilation        | 2 (2)                | 2 (2)            | 2 (2)                | 2 (2)            | 2 (2)                | 2 (2)            | 2 (2)                | 2 (1.8)          | 2 (2)           | 2 (2)            |
| Surgical NEC (%)                                    | 0 (0)                | 1 (1)            | 2 (2)                | 5 (5)            | 6 (6)                | 9 (9)            | 7 (7)                | 10 (10)          | 15 (4)          | 25 (6)           |

BPD: bronchopulmonary dysplasia; FiO<sub>2</sub>: fraction of inspired oxygen; NEC: necrotizing enterocolitis

**eTable 2.** Additional Clinical Characteristics by Quartile of Baseline Risk for Grades 2 to 3 BPD or Death

|                                                            | Quartile 1<br>18-45% | Quartile 2<br>46-53% | Quartile 3<br>54-65% | Quartile 4<br>66-84% | All        |
|------------------------------------------------------------|----------------------|----------------------|----------------------|----------------------|------------|
|                                                            | n=199                | n=200                | n=200                | n=200                | n=799      |
| Days of mechanical ventilation <sup>a</sup> : median (IQR) | 30 (21-43)           | 37 (29-51)           | 42 (30-57)           | 46 (35-65)           | 38 (28-54) |
| Highest FiO <sub>2</sub> at enrollment: median (IQR)       | 33 (30-40)           | 40 (34-48)           | 50 (40-61)           | 70 (60-97)           | 46 (35-61) |
| Extubation failure <sup>a</sup> : n/N (%)                  | 16 (8)               | 28 (14)              | 27 (15)              | 38 (21)              | 109 (15)   |
| Open label dexamethasone exposure: n/N (%)                 | 56 (29)              | 64 (33)              | 92 (51)              | 94 (53)              | 306 (41)   |
| Clinical chorioamnionitis: n/N (%)                         | 36 (18)              | 43 (22)              | 29 (15)              | 22 (11)              | 130 (16)   |
| Surgical PDA treatment: n/N (%)                            | 30 (15)              | 40 (20)              | 27 (14)              | 27 (14)              | 124 (16)   |
| Pharmacological PDA treatment: n/N (%)                     | 96 (48)              | 91 (46)              | 87 (44)              | 82 (41)              | 356 (45)   |
| Early onset sepsis: n/N (%)                                | 2 (1)                | 2 (1)                | 7 (4)                | 3 (2)                | 14 (2)     |
| Late onset sepsis: n/N (%)                                 | 37 (19)              | 63 (32)              | 68 (34)              | 70 (35)              | 238 (30)   |

BPD: bronchopulmonary dysplasia; FiO<sub>2</sub>: fraction of inspired oxygen; PDA: patent ductus arteriosus

**eTable 3.** Additional Clinical Characteristics by Quartile of Baseline Risk for Grades 2 to 3 BPD or Death and Exposure Group

|                                                            | Quartile 1<br>18-45% |                 | Quartile 2<br>46-53% |                  | Quartile 3<br>54-65% |                  | Quartile 4<br>66-84% |                  | All             |                  |
|------------------------------------------------------------|----------------------|-----------------|----------------------|------------------|----------------------|------------------|----------------------|------------------|-----------------|------------------|
|                                                            | HC<br>n=110          | Placebo<br>n=89 | HC<br>n=89           | Placebo<br>n=111 | HC<br>n=99           | Placebo<br>n=101 | HC<br>n=100          | Placebo<br>n=100 | HC<br>n=398     | Placebo<br>n=401 |
| Days of mechanical ventilation <sup>a</sup> : median (IQR) | 33<br>(23-46)        | 29<br>(20-40)   | 36<br>(27-51)        | 37<br>(30-51)    | 40<br>(27-56)        | 44.5<br>(33-58)  | 43<br>(31-60)        | 50<br>(38-66)    | 37<br>(27-54)   | 40<br>(30-55)    |
| Highest FiO <sub>2</sub> at enrollment: median (IQR)       | 32.5<br>(30-40)      | 33<br>(30-39)   | 45<br>(35-50)        | 39<br>(34-46)    | 51<br>(41-62)        | 50<br>(40-60)    | 73<br>(59-100)       | 70<br>(60-87)    | 47<br>(35-63)   | 45<br>(35-60)    |
| Extubation failure <sup>a</sup> : n/N (%)                  | 11/109<br>(10)       | 5/87<br>(6)     | 13/88<br>(15)        | 15/108<br>(14)   | 13/90<br>(14)        | 14/89<br>(16)    | 21/91<br>(23)        | 17/88<br>(19)    | 58/378<br>(15)  | 51/372<br>(14)   |
| Open label dexamethasone exposure: n/N (%)                 | 35/109<br>(32)       | 21/87<br>(24)   | 27/88<br>(31)        | 37/108<br>(34)   | 42/90<br>(47)        | 50/89<br>(56)    | 46/91<br>(51)        | 48/88<br>(55)    | 150/378<br>(40) | 156/372<br>(42)  |
| Clinical chorioamnionitis: n/N (%)                         | 24/109 (22)          | 12/89<br>(14)   | 19/89<br>(21)        | 24/111<br>(22)   | 12/99<br>(12)        | 17/100<br>(17)   | 10/100<br>(10)       | 12/100<br>(12)   | 65/397<br>(16)  | 65/400<br>(16)   |
| Surgical PDA treatment: n/N (%)                            | 21/110 (19)          | 9/89<br>(10)    | 22/89<br>(25)        | 18/111<br>(16)   | 11/99<br>(11)        | 16/101<br>(16)   | 13/100<br>(13)       | 14/100<br>(14)   | 67/398<br>(17)  | 57/401<br>(14)   |
| Pharmacological PDA treatment: n/N (%)                     | 58/110 (53)          | 38/89<br>(43)   | 39/89<br>(44)        | 52/111<br>(47)   | 39/99<br>(39)        | 48/101<br>(48)   | 37/100<br>(37)       | 45/100<br>(45)   | 173/398<br>(44) | 183/401<br>(46)  |
| Early onset sepsis: n/N (%)                                | 2/110 (2)            | 0/89 (0)        | 1/89 (1)             | 1/111<br>(1)     | 5/99 (5)             | 2/101<br>(2)     | 1/100<br>(1)         | 2/100<br>(2)     | 9/398<br>(2)    | 5/401(1)         |
| Late onset sepsis: n/N (%)                                 | 16/110 (15)          | 21/89<br>(24)   | 30/89<br>(34)        | 33/111<br>(28)   | 37/99<br>(37)        | 31/101<br>(31)   | 38/100<br>(38)       | 32/100<br>(32)   | 121/398<br>(30) | 117/401<br>(29)  |

<sup>a</sup>Among surviving infants by 36 weeks' postmenstrual age; PDA: patent ductus arteriosus

**eFigure 1.** CONSORT Flow Diagram

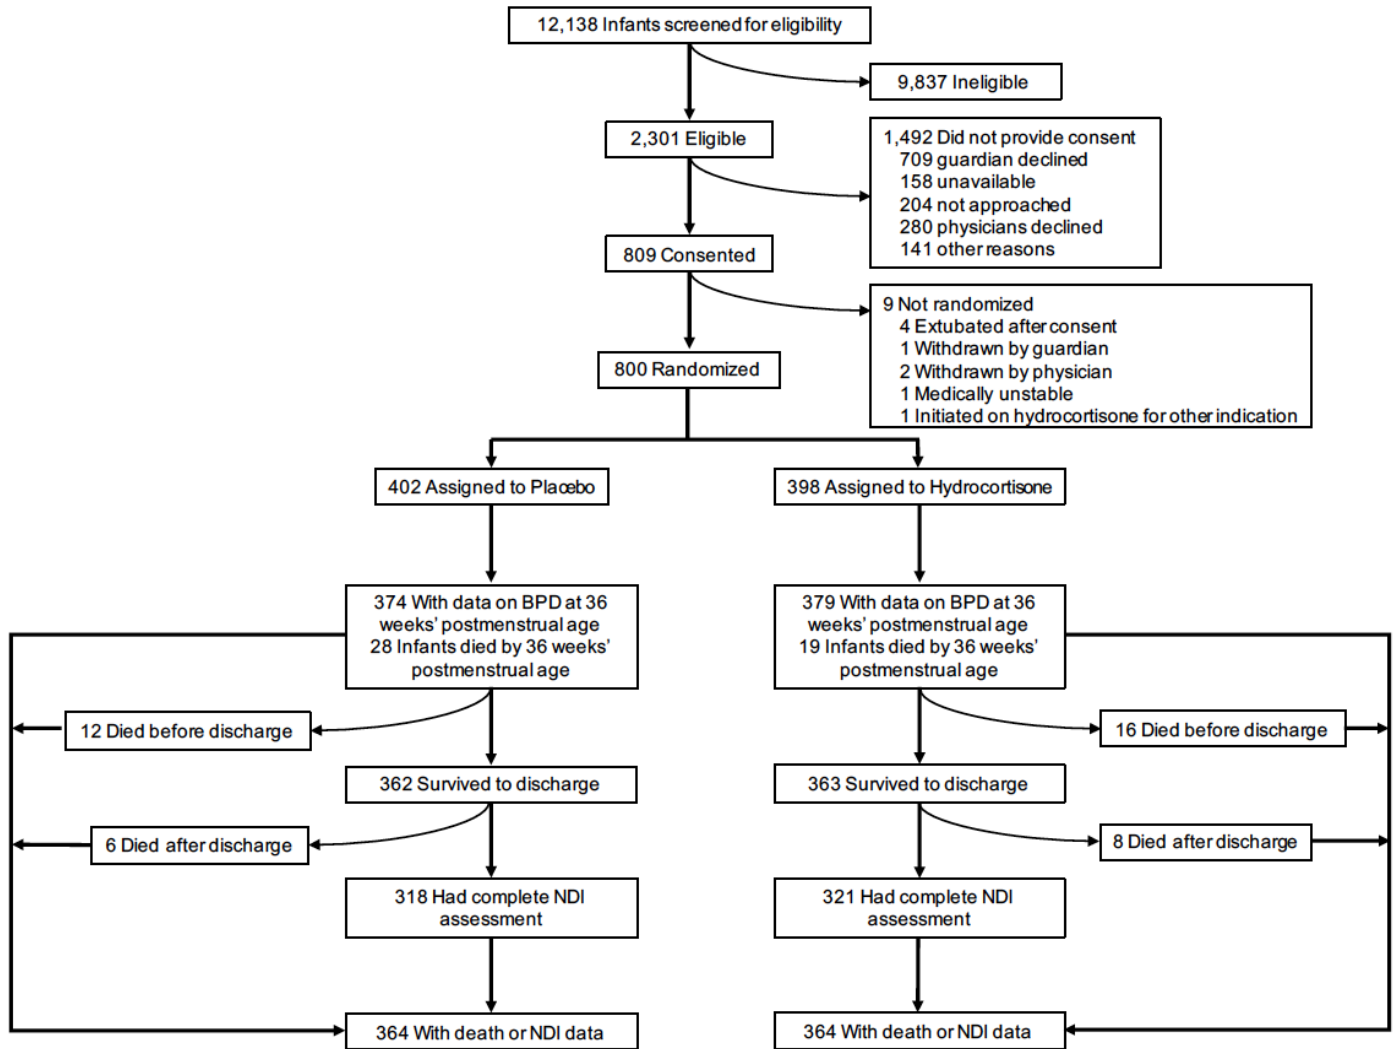

**eFigure 1.** CONSORT Flow Diagram detailing eligible, consented, and randomized infants followed by infants available for analysis of both safety and efficacy outcomes.

**eFigure 2.** Distribution of Predicted Probability of Grades 2 to 3 BPD or Death in the Enrolled Population

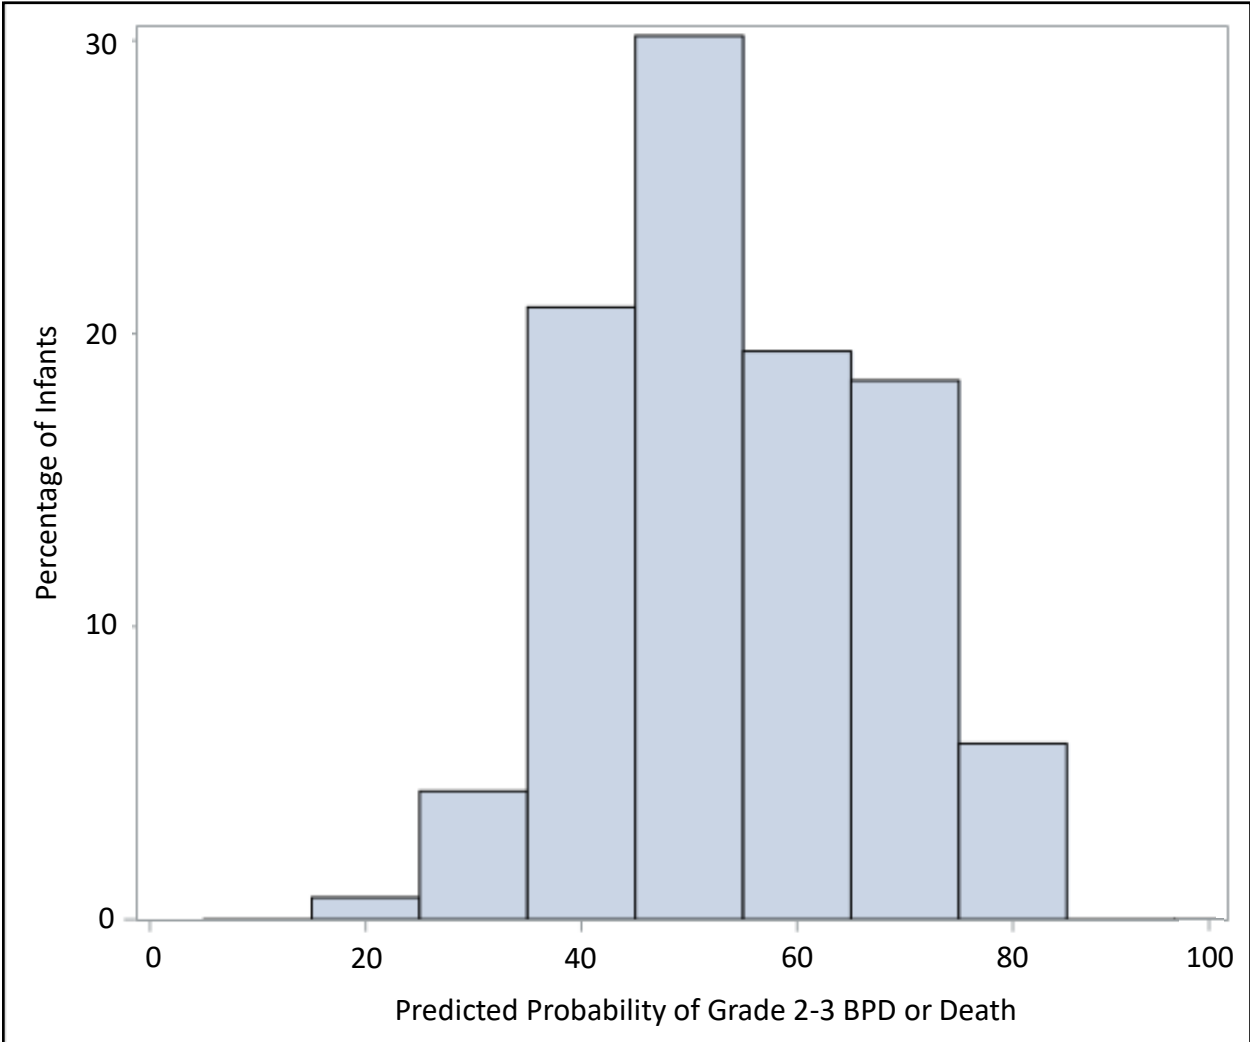

**eFigure 2.** Distribution of predicted probability of grade 2-3 BPD or death in the enrolled population. The mean predicted probability was 55% (range 18-84%).

**eFigure 3.** Calibration Plot of Association of Estimated Probability of Grades 2 to 3 BPD or Death to the Observed Outcome of Grades 2 to 3 BPD or Death

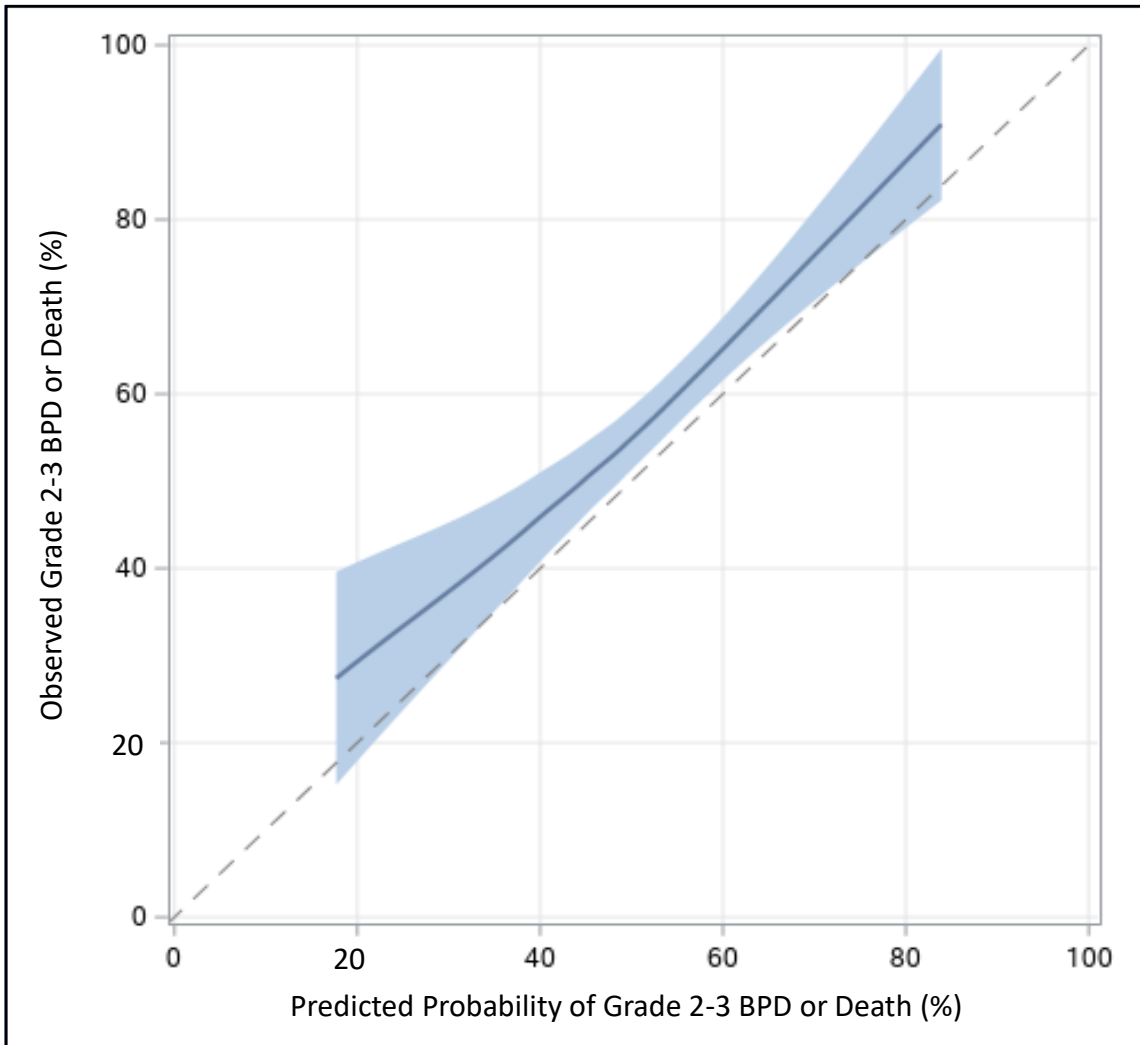

**eFigure 3.** Calibration plot relating predicted probability of grade 2-3 BPD or death to the observed outcome of grade 2-3 BPD or death. The ratio of observed to expected outcomes was 1.09.
