# Supplementary material for: Heterogeneity of Treatment Effects of Hydrocortisone by Risk of Bronchopulmonary Dysplasia or Death Among Extremely Preterm Infants in the National Institute of Child Health and Human Development Neonatal Research Network Trial: A Secondary Analysis of a Randomized Clinical Trial
Source: PubMed Central journal article supplement (PMC10233424; doi:10.1001/jamanetworkopen.2023.15315), 2023-05-31
Supplement: jamanetwopen-e2315315-s003.pdf [file jamanetwopen-e2315315-s003.pdf]

\*First name, last name, and suffix (if applicable) are required and will appear in PubMed.

| <b>*Group Name(s): National Institute of Child Health and Human Development Neonatal Research Network</b> |                   |                              |                  |                                                                                        |                                          |                                                         |                                                                                            |  |
|-----------------------------------------------------------------------------------------------------------|-------------------|------------------------------|------------------|----------------------------------------------------------------------------------------|------------------------------------------|---------------------------------------------------------|--------------------------------------------------------------------------------------------|--|
| <b>*First Name and Middle Initial(s)</b>                                                                  | <b>*Last Name</b> | <b>*Suffix (eg, Jr, III)</b> | Academic Degrees | Institution                                                                            | Location (city, state/province, country) | Role or Contribution, eg, chair, principal investigator | Group (if more than 1 Group listed in the byline) and/or Subgroup (eg, Steering Committee) |  |
| Abbot R                                                                                                   | Laptook           |                              | MD               | Alpert Medical School of Brown University and Women & Infants Hospital of Rhode Island | Providence, RI                           | investigator                                            |                                                                                            |  |
| Martin                                                                                                    | Keszler           |                              | MD               | Alpert Medical School of Brown University and Women & Infants Hospital of Rhode Island | Providence, RI                           | investigator                                            |                                                                                            |  |
| Betty R                                                                                                   | Vohr              |                              | MD               | Alpert Medical School of Brown University and Women & Infants Hospital of Rhode Island | Providence, RI                           | investigator                                            |                                                                                            |  |
| Angelita M                                                                                                | Hensman           |                              | PhD RNC-NIC      | Alpert Medical School of Brown University and Women & Infants Hospital of Rhode Island | Providence, RI                           | assisted with patient enrollment and data collection    |                                                                                            |  |
| Elisa                                                                                                     | Vieira            |                              | BSN RN           | Alpert Medical School of Brown University and Women & Infants Hospital of Rhode Island | Providence, RI                           | assisted with patient enrollment and data collection    |                                                                                            |  |
| Lucille                                                                                                   | St. Pierre        |                              | BSN RN           | Alpert Medical School of Brown University and Women & Infants Hospital of Rhode Island | Providence, RI                           | assisted with patient enrollment and data collection    |                                                                                            |  |
| Robert T                                                                                                  | Burke             |                              | MD, MPH          | Alpert Medical School of Brown University and Women & Infants Hospital of Rhode Island | Providence, RI                           | assisted with patient enrollment and data collection    |                                                                                            |  |
| Barbara                                                                                                   | Alksinis          |                              | RNC PNP          | Alpert Medical School of Brown University and Women & Infants Hospital of Rhode Island | Providence, RI                           | assisted with patient enrollment and data collection    |                                                                                            |  |
| Melinda                                                                                                   | Caskey            |                              | MD               | Alpert Medical School of Brown University and Women & Infants Hospital of Rhode Island | Providence, RI                           | investigator                                            |                                                                                            |  |
| Laurie                                                                                                    | Hoffman           |                              | MD               | Alpert Medical School of Brown University and Women & Infants Hospital of Rhode Island | Providence, RI                           | investigator                                            |                                                                                            |  |

## Supplemental Online Content: Nonauthor Collaborators

\*First name, last name, and suffix (if applicable) are required and will appear in PubMed.

| *First Name and Middle Initial(s) | *Last Name      | *Suffix (eg, Jr, III) | Academic Degrees | Institution                                                                            | Location (city, state/province, country) | Role or Contribution, eg, chair, principal investigator | Group (if more than 1 Group listed in the byline) and/or Subgroup (eg, Steering Committee) |  |
|-----------------------------------|-----------------|-----------------------|------------------|----------------------------------------------------------------------------------------|------------------------------------------|---------------------------------------------------------|--------------------------------------------------------------------------------------------|--|
| Katharine                         | Johnson         |                       | MD               | Alpert Medical School of Brown University and Women & Infants Hospital of Rhode Island | Providence, RI                           | investigator                                            |                                                                                            |  |
| Mary L                            | Keszler         |                       | MD               | Alpert Medical School of Brown University and Women & Infants Hospital of Rhode Island | Providence, RI                           | investigator                                            |                                                                                            |  |
| Andrea                            | Knoll           |                       |                  | Alpert Medical School of Brown University and Women & Infants Hospital of Rhode Island | Providence, RI                           | assisted with patient enrollment and data collection    |                                                                                            |  |
| Teresa M                          | Leach           |                       | Med CAES         | Alpert Medical School of Brown University and Women & Infants Hospital of Rhode Island | Providence, RI                           | assisted with patient enrollment and data collection    |                                                                                            |  |
| Emily                             | Little          |                       | BSN RN           | Alpert Medical School of Brown University and Women & Infants Hospital of Rhode Island | Providence, RI                           | assisted with patient enrollment and data collection    |                                                                                            |  |
| Elisabeth C                       | McGowan         |                       | MD               | Alpert Medical School of Brown University and Women & Infants Hospital of Rhode Island | Providence, RI                           | investigator                                            |                                                                                            |  |
| Bonnie E                          | Stephens        |                       | MD               | Alpert Medical School of Brown University and Women & Infants Hospital of Rhode Island | Providence, RI                           | investigator                                            |                                                                                            |  |
| Victoria E                        | Watson          |                       | MS CAS           | Alpert Medical School of Brown University and Women & Infants Hospital of Rhode Island | Providence, RI                           | investigator                                            |                                                                                            |  |
| Anna Maria                        | Hibbs           |                       | MD, MSCE         | Case Western Reserve University, Rainbow Babies & Children's Hospital                  | Cleveland, OH                            | investigator                                            |                                                                                            |  |
| Michele C                         | Walsh           |                       | MD, MS           | Case Western Reserve University, Rainbow Babies & Children's Hospital                  | Cleveland, OH                            | investigator                                            |                                                                                            |  |
| Deanne E                          | Wilson-Costello |                       | MD               | Case Western Reserve University, Rainbow Babies & Children's Hospital                  | Cleveland, OH                            | investigator                                            |                                                                                            |  |

## Supplemental Online Content: Nonauthor Collaborators

\*First name, last name, and suffix (if applicable) are required and will appear in PubMed.

| *First Name and Middle Initial(s) | *Last Name | *Suffix (eg, Jr, III) | Academic Degrees            | Institution                                                                                     | Location (city, state/province, country) | Role or Contribution, eg, chair, principal investigator | Group (if more than 1 Group listed in the byline) and/or Subgroup (eg, Steering Committee) |  |
|-----------------------------------|------------|-----------------------|-----------------------------|-------------------------------------------------------------------------------------------------|------------------------------------------|---------------------------------------------------------|--------------------------------------------------------------------------------------------|--|
| Nancy S                           | Newman     |                       | RN                          | Case Western Reserve University, Rainbow Babies & Children's Hospital                           | Cleveland, OH                            | assisted with patient enrollment and data collection    |                                                                                            |  |
| Monika                            | Bhola      |                       | MD                          | Case Western Reserve University, Rainbow Babies & Children's Hospital                           | Cleveland, OH                            | investigator                                            |                                                                                            |  |
| Allison H                         | Payne      |                       | MD, MS                      | Case Western Reserve University, Rainbow Babies & Children's Hospital                           | Cleveland, OH                            | investigator                                            |                                                                                            |  |
| Bonnie S                          | Siner      |                       | RN                          | Case Western Reserve University, Rainbow Babies & Children's Hospital                           | Cleveland, OH                            | assisted with patient enrollment and data collection    |                                                                                            |  |
| Gulgun                            | Yalcinkaya |                       | MD                          | Case Western Reserve University, Rainbow Babies & Children's Hospital                           | Cleveland, OH                            | investigator                                            |                                                                                            |  |
| William E                         | Truog      |                       | MD                          | Children's Mercy Hospital                                                                       | Kansas City, MO                          | investigator                                            |                                                                                            |  |
| Howard W                          | Kilbride   |                       | MD                          | Children's Mercy Hospital                                                                       | Kansas City, MO                          | investigator                                            |                                                                                            |  |
| Cheri                             | Gauldin    |                       | RN, BS<br>CCRC              | Children's Mercy Hospital                                                                       | Kansas City, MO                          | assisted with patient enrollment and data collection    |                                                                                            |  |
| Eugenia K                         | Palotto    |                       | MD, MSCE                    | Children's Mercy Hospital                                                                       | Kansas City, MO                          | investigator                                            |                                                                                            |  |
| Anne                              | Holmes     |                       | RN, MSN,<br>MBA-HCM<br>CCRC | Children's Mercy Hospital                                                                       | Kansas City, MO                          | assisted with patient enrollment and data collection    |                                                                                            |  |
| Kathy                             | Johnson    |                       | RN, CCRC                    | Children's Mercy Hospital                                                                       | Kansas City, MO                          | assisted with patient enrollment and data collection    |                                                                                            |  |
| Allison                           | Scott      |                       | RNC-NIC<br>BSN CCRC         | Children's Mercy Hospital                                                                       | Kansas City, MO                          | assisted with patient enrollment and data collection    |                                                                                            |  |
| Brenda B                          | Poindexter |                       | MD, MS                      | Cincinnati Children's Hospital Medical Center, University Hospital, and Good Samaritan Hospital | Cincinnati, OH                           | investigator                                            |                                                                                            |  |

## Supplemental Online Content: Nonauthor Collaborators

\*First name, last name, and suffix (if applicable) are required and will appear in PubMed.

| *First Name and Middle Initial(s) | *Last Name   | *Suffix (eg, Jr, III) | Academic Degrees | Institution                                                                                     | Location (city, state/province, country) | Role or Contribution, eg, chair, principal investigator | Group (if more than 1 Group listed in the byline) and/or Subgroup (eg, Steering Committee) |  |
|-----------------------------------|--------------|-----------------------|------------------|-------------------------------------------------------------------------------------------------|------------------------------------------|---------------------------------------------------------|--------------------------------------------------------------------------------------------|--|
| Kurt                              | Schibler     |                       | MD               | Cincinnati Children's Hospital Medical Center, University Hospital, and Good Samaritan Hospital | Cincinnati, OH                           | investigator                                            |                                                                                            |  |
| Stephanie                         | Merhar       |                       | MD, MS           | Cincinnati Children's Hospital Medical Center, University Hospital, and Good Samaritan Hospital | Cincinnati, OH                           | investigator                                            |                                                                                            |  |
| Kimberly                          | Yolton       |                       | PhD              | Cincinnati Children's Hospital Medical Center, University Hospital, and Good Samaritan Hospital | Cincinnati, OH                           | assisted with patient enrollment and data collection    |                                                                                            |  |
| Cathy                             | Grisby       |                       | BSN CCRC         | Cincinnati Children's Hospital Medical Center, University Hospital, and Good Samaritan Hospital | Cincinnati, OH                           | assisted with patient enrollment and data collection    |                                                                                            |  |
| Traci                             | Beiersdorfer |                       | RN bsn           | Cincinnati Children's Hospital Medical Center, University Hospital, and Good Samaritan Hospital | Cincinnati, OH                           | assisted with patient enrollment and data collection    |                                                                                            |  |
| Tanya E                           | Cahill       |                       | MD               | Cincinnati Children's Hospital Medical Center, University Hospital, and Good Samaritan Hospital | Cincinnati, OH                           | investigator                                            |                                                                                            |  |
| Juanita                           | Dudley       |                       | RN BSN           | Cincinnati Children's Hospital Medical Center, University Hospital, and Good Samaritan Hospital | Cincinnati, OH                           | assisted with patient enrollment and data collection    |                                                                                            |  |
| Teresa L                          | Gratton      |                       | PA               | Cincinnati Children's Hospital Medical Center, University Hospital, and Good Samaritan Hospital | Cincinnati, OH                           | assisted with patient enrollment and data collection    |                                                                                            |  |

Supplemental Online Content: Nonauthor Collaborators

\*First name, last name, and suffix (if applicable) are required and will appear in PubMed.

| *First Name and Middle Initial(s) | *Last Name | *Suffix (eg, Jr, III) | Academic Degrees | Institution                                                                                     | Location (city, state/province, country) | Role or Contribution, eg, chair, principal investigator | Group (if more than 1 Group listed in the byline) and/or Subgroup (eg, Steering Committee) |  |
|-----------------------------------|------------|-----------------------|------------------|-------------------------------------------------------------------------------------------------|------------------------------------------|---------------------------------------------------------|--------------------------------------------------------------------------------------------|--|
| Kristin                           | Kirker     |                       | CRC              | Cincinnati Children's Hospital Medical Center, University Hospital, and Good Samaritan Hospital | Cincinnati, OH                           | assisted with patient enrollment and data collection    |                                                                                            |  |
| Julia                             | Thompson   |                       | RN BSN           | Cincinnati Children's Hospital Medical Center, University Hospital, and Good Samaritan Hospital | Cincinnati, OH                           | assisted with patient enrollment and data collection    |                                                                                            |  |
| Sandra                            | Wuertz     |                       | RN BSN<br>CLC    | Cincinnati Children's Hospital Medical Center, University Hospital, and Good Samaritan Hospital | Cincinnati, OH                           | assisted with patient enrollment and data collection    |                                                                                            |  |
| Richard A                         | Polin      |                       | MD               | Columbia University                                                                             | New York, NY                             | NRN Steering Committee Chair                            |                                                                                            |  |
| Michael                           | Cotton     |                       | MD MHS           | Duke University School of Medicine                                                              | Durham, NC                               | investigator                                            |                                                                                            |  |
| Ronald N                          | Goldberg   |                       | MD               | Duke University School of Medicine                                                              | Durham, NC                               | investigator                                            |                                                                                            |  |
| William F                         | Malcolm    |                       | MD               | Duke University School of Medicine                                                              | Durham, NC                               | investigator                                            |                                                                                            |  |
| Ricki F                           | Goldstein  |                       | MD               | Duke University School of Medicine                                                              | Durham, NC                               | investigator                                            |                                                                                            |  |
| Joanne                            | Finkle     |                       | RN JD            | Duke University School of Medicine                                                              | Durham, NC                               | assisted with patient enrollment and data collection    |                                                                                            |  |
| Patricia L                        | Ashley     |                       | MD               | Duke University School of Medicine                                                              | Durham, NC                               | investigator                                            |                                                                                            |  |
| Kimberley A                       | Fisher     |                       | PhD FNP-BC IBCLC | Duke University School of Medicine                                                              | Durham, NC                               | assisted with patient enrollment and data collection    |                                                                                            |  |
| Kathryn E                         | Gustafson  |                       | PhD              | Duke University School of Medicine                                                              | Durham, NC                               | assisted with patient enrollment and data collection    |                                                                                            |  |
| Deesha                            | Mago-Shah  |                       | MD               | Duke University School of Medicine                                                              | Durham, NC                               | investigator                                            |                                                                                            |  |
| Mollie                            | Warren     |                       | MD               | Duke University School of Medicine                                                              | Durham, NC                               | investigator                                            |                                                                                            |  |
| Carl L                            | Bose       |                       | MD               | Duke University School of Medicine                                                              | Durham, NC                               | investigator                                            |                                                                                            |  |
| Janice                            | Bernhardt  |                       | MS RN            | Duke University School of Medicine                                                              | Durham, NC                               | assisted with patient enrollment and data collection    |                                                                                            |  |
| Gennie                            | Bose       |                       | RN               | Duke University School of Medicine                                                              | Durham, NC                               | assisted with patient enrollment and data collection    |                                                                                            |  |
| Janice                            | Wereszczak |                       | CPNP-AC/PC       | Duke University School of Medicine                                                              | Durham, NC                               | assisted with patient enrollment and data collection    |                                                                                            |  |
| Diane                             | Warner     |                       | MD MPH           | Duke University School of Medicine                                                              | Durham, NC                               | investigator                                            |                                                                                            |  |
|                                   |            |                       |                  |                                                                                                 |                                          |                                                         |                                                                                            |  |
|                                   |            |                       |                  |                                                                                                 |                                          |                                                         |                                                                                            |  |
|                                   |            |                       |                  |                                                                                                 |                                          |                                                         |                                                                                            |  |

## Supplemental Online Content: Nonauthor Collaborators

\*First name, last name, and suffix (if applicable) are required and will appear in PubMed.

| *First Name and Middle Initial(s) | *Last Name        | *Suffix (eg, Jr, III) | Academic Degrees | Institution                                                                            | Location (city, state/province, country) | Role or Contribution, eg, chair, principal investigator | Group (if more than 1 Group listed in the byline) and/or Subgroup (eg, Steering Committee) |
|-----------------------------------|-------------------|-----------------------|------------------|----------------------------------------------------------------------------------------|------------------------------------------|---------------------------------------------------------|--------------------------------------------------------------------------------------------|
|                                   |                   |                       |                  |                                                                                        |                                          |                                                         |                                                                                            |
|                                   |                   |                       |                  |                                                                                        |                                          |                                                         |                                                                                            |
| Cindy                             | Clark             |                       | RN               | Duke University School of Medicine                                                     | Durham, NC                               | assisted with patient enrollment and data collection    |                                                                                            |
| Stephen D                         | Kicklighter       |                       | MD               | Duke University School of Medicine                                                     | Durham, NC                               | investigator                                            |                                                                                            |
| Alexandra                         | Bentley           |                       | MD               | Duke University School of Medicine                                                     | Durham, NC                               | investigator                                            |                                                                                            |
| Laura                             | Edwards           |                       | MD               | Duke University School of Medicine                                                     | Durham, NC                               | investigator                                            |                                                                                            |
| Ginger                            | Rhodes-Ryan       |                       | ARNP MSN         | Duke University School of Medicine                                                     | Durham, NC                               | assisted with patient enrollment and data collection    |                                                                                            |
| Donna                             | White             |                       | RN-BC BSN        | Duke University School of Medicine                                                     | Durham, NC                               | assisted with patient enrollment and data collection    |                                                                                            |
| David P                           | Carlton           |                       | MD               | Emory University                                                                       | Atlanta, GA                              | investigator                                            |                                                                                            |
| Barbara J                         | Stoll             |                       | MD               | Emory University                                                                       | Atlanta, GA                              | investigator                                            |                                                                                            |
| Ellen C                           | Hale              |                       | B RN CCRC        | Emory University                                                                       | Atlanta, GA                              | assisted with patient enrollment and data collection    |                                                                                            |
| Yvonne                            | Loggins           |                       | RN               | Emory University                                                                       | Atlanta, GA                              | assisted with patient enrollment and data collection    |                                                                                            |
| Diane                             | Bottcher          |                       | RN               | Emory University                                                                       | Atlanta, GA                              | assisted with patient enrollment and data collection    |                                                                                            |
| Sheena L                          | Carter            |                       | PhD              | Emory University                                                                       | Atlanta, GA                              | assisted with patient enrollment and data collection    |                                                                                            |
| Salathiel                         | Kendrick-Allywood |                       | MD               | Emory University                                                                       | Atlanta, GA                              | investigator                                            |                                                                                            |
| Maureen                           | Mulligan LaRossa  |                       | RN               | Emory University                                                                       | Atlanta, GA                              | assisted with patient enrollment and data collection    |                                                                                            |
| Colleen                           | Mackie            |                       | RRT              | Emory University                                                                       | Atlanta, GA                              | assisted with patient enrollment and data collection    |                                                                                            |
| Gloria                            | Smikle            |                       | PNP              | Emory University                                                                       | Atlanta, GA                              | assisted with patient enrollment and data collection    |                                                                                            |
| Lynn C                            | Comerford         |                       | NNP              | Emory University                                                                       | Atlanta, GA                              | assisted with patient enrollment and data collection    |                                                                                            |
| Judith                            | Laursen           |                       | RN               | Emory University                                                                       | Atlanta, GA                              | assisted with patient enrollment and data collection    |                                                                                            |
| Amy                               | Sanders           |                       | PsyD             | Emory University                                                                       | Atlanta, GA                              | assisted with patient enrollment and data collection    |                                                                                            |
| Brenda B                          | Poindexter        |                       | MD MS            | Emory University                                                                       | Atlanta, GA                              | investigator                                            |                                                                                            |
| Nathalie L                        | Maitre            |                       | MD PhD           | Emory University                                                                       | Atlanta, GA                              | investigator                                            |                                                                                            |
| Ira                               | Adams-Chapman     |                       | MD               | Emory University                                                                       | Atlanta, GA                              | investigator                                            |                                                                                            |
| Andrew A                          | Bremer            |                       | MD PhD           | <i>Eunice Kennedy Shriver</i> National Institute of Child Health and Human Development | Bethesda, MD                             | investigator                                            |                                                                                            |
| Stephanie                         | Wilson Archer     |                       | MA               | <i>Eunice Kennedy Shriver</i> National Institute of Child Health and Human Development | Bethesda, MD                             | assisted with patient enrollment and data collection    |                                                                                            |

## Supplemental Online Content: Nonauthor Collaborators

\*First name, last name, and suffix (if applicable) are required and will appear in PubMed.

| *First Name and Middle Initial(s) | *Last Name       | *Suffix (eg, Jr, III) | Academic Degrees | Institution                                                                            | Location (city, state/province, country) | Role or Contribution, eg, chair, principal investigator | Group (if more than 1 Group listed in the byline) and/or Subgroup (eg, Steering Committee) |
|-----------------------------------|------------------|-----------------------|------------------|----------------------------------------------------------------------------------------|------------------------------------------|---------------------------------------------------------|--------------------------------------------------------------------------------------------|
| Rosemary D                        | Higgins          |                       | MD               | <i>Eunice Kennedy Shriver</i> National Institute of Child Health and Human Development | Bethesda, MD                             | investigator                                            |                                                                                            |
| Jon E                             | Tyson            |                       | MD MPH           | McGovern Medical School at The University of Texas Health Science Center at Houston    | Houston, TX                              | investigator                                            |                                                                                            |
| Amir M                            | Khan             |                       | MD               | McGovern Medical School at The University of Texas Health Science Center at Houston    | Houston, TX                              | investigator                                            |                                                                                            |
| Kathleen A                        | Kennedy          |                       | MPD MPH          | McGovern Medical School at The University of Texas Health Science Center at Houston    | Houston, TX                              | investigator                                            |                                                                                            |
| Barbara J                         | Stoll            |                       | MD               | McGovern Medical School at The University of Texas Health Science Center at Houston    | Houston, TX                              | investigator                                            |                                                                                            |
| Ricardo A                         | Mosquera         |                       | MD MS            | McGovern Medical School at The University of Texas Health Science Center at Houston    | Houston, TX                              | investigator                                            |                                                                                            |
| Andrea F                          | Duncan           |                       | MD               | McGovern Medical School at The University of Texas Health Science Center at Houston    | Houston, TX                              | investigator                                            |                                                                                            |
| Georgia E                         | McDavid          |                       | RN               | McGovern Medical School at The University of Texas Health Science Center at Houston    | Houston, TX                              |                                                         |                                                                                            |
| Nora                              | Alaniz           |                       | BS               | McGovern Medical School at The University of Texas Health Science Center at Houston    | Houston, TX                              | assisted with patient enrollment and data collection    |                                                                                            |
| Elizabeth                         | Allain           |                       | Phd              | McGovern Medical School at The University of Texas Health Science Center at Houston    | Houston, TX                              | assisted with patient enrollment and data collection    |                                                                                            |
| Julie                             | Arltdt-McAlister |                       | RN BSN           | McGovern Medical School at The University of Texas Health Science Center at Houston    | Houston, TX                              | assisted with patient enrollment and data collection    |                                                                                            |

## Supplemental Online Content: Nonauthor Collaborators

\*First name, last name, and suffix (if applicable) are required and will appear in PubMed.

| *First Name and Middle Initial(s) | *Last Name | *Suffix (eg, Jr, III) | Academic Degrees | Institution                                                                         | Location (city, state/province, country) | Role or Contribution, eg, chair, principal investigator | Group (if more than 1 Group listed in the byline) and/or Subgroup (eg, Steering Committee) |  |
|-----------------------------------|------------|-----------------------|------------------|-------------------------------------------------------------------------------------|------------------------------------------|---------------------------------------------------------|--------------------------------------------------------------------------------------------|--|
| Debasree                          | Sana Boral |                       | MD               | McGovern Medical School at The University of Texas Health Science Center at Houston | Houston, TX                              | investigator                                            |                                                                                            |  |
| Katrina                           | Burson     |                       | RN BSN           | McGovern Medical School at The University of Texas Health Science Center at Houston | Houston, TX                              | assisted with patient enrollment and data collection    |                                                                                            |  |
| Allison G                         | Dempsey    |                       | PhD              | McGovern Medical School at The University of Texas Health Science Center at Houston | Houston, TX                              | assisted with patient enrollment and data collection    |                                                                                            |  |
| Elizabeth                         | Eason      |                       | MD               | McGovern Medical School at The University of Texas Health Science Center at Houston | Houston, TX                              | investigator                                            |                                                                                            |  |
| Patricia W                        | Evans      |                       | MD               | McGovern Medical School at The University of Texas Health Science Center at Houston | Houston, TX                              | investigator                                            |                                                                                            |  |
| Carmen                            | Garcia     |                       | RN CCRP          | McGovern Medical School at The University of Texas Health Science Center at Houston | Houston, TX                              | assisted with patient enrollment and data collection    |                                                                                            |  |
| Charles                           | Green      |                       | PhD              | McGovern Medical School at The University of Texas Health Science Center at Houston | Houston, TX                              | assisted with patient enrollment and data collection    |                                                                                            |  |
| Donna J                           | Hall       |                       | RN               | McGovern Medical School at The University of Texas Health Science Center at Houston | Houston, TX                              | assisted with patient enrollment and data collection    |                                                                                            |  |
| Margarita                         | Jiminez    |                       | MD MPH           | McGovern Medical School at The University of Texas Health Science Center at Houston | Houston, TX                              | investigator                                            |                                                                                            |  |
| Janice                            | John       |                       | CPNP             | McGovern Medical School at The University of Texas Health Science Center at Houston | Houston, TX                              | assisted with patient enrollment and data collection    |                                                                                            |  |
| Patrick M                         | Jones      |                       | MD MA            | McGovern Medical School at The University of Texas Health Science Center at Houston | Houston, TX                              | investigator                                            |                                                                                            |  |



## Supplemental Online Content: Nonauthor Collaborators

\*First name, last name, and suffix (if applicable) are required and will appear in PubMed.

| *First Name and Middle Initial(s) | *Last Name | *Suffix (eg, Jr, III) | Academic Degrees | Institution                                                                         | Location (city, state/province, country) | Role or Contribution, eg, chair, principal investigator | Group (if more than 1 Group listed in the byline) and/or Subgroup (eg, Steering Committee) |
|-----------------------------------|------------|-----------------------|------------------|-------------------------------------------------------------------------------------|------------------------------------------|---------------------------------------------------------|--------------------------------------------------------------------------------------------|
| M. Layne                          | Lillie     |                       | RN BSN           | McGovern Medical School at The University of Texas Health Science Center at Houston | Houston, TX                              | assisted with patient enrollment and data collection    |                                                                                            |
| Karen                             | Martin     |                       | RN               | McGovern Medical School at The University of Texas Health Science Center at Houston | Houston, TX                              | assisted with patient enrollment and data collection    |                                                                                            |
| Sara C                            | Martin     |                       | RN BSN           | McGovern Medical School at The University of Texas Health Science Center at Houston | Houston, TX                              | assisted with patient enrollment and data collection    |                                                                                            |
| Carrie M                          | Mason      |                       | MA LPA           | McGovern Medical School at The University of Texas Health Science Center at Houston | Houston, TX                              | assisted with patient enrollment and data collection    |                                                                                            |
| Georgia E                         | McDavid    |                       | RN               | McGovern Medical School at The University of Texas Health Science Center at Houston | Houston, TX                              | assisted with patient enrollment and data collection    |                                                                                            |
| Shannon L                         | McKee      |                       | EdS              | McGovern Medical School at The University of Texas Health Science Center at Houston | Houston, TX                              | assisted with patient enrollment and data collection    |                                                                                            |
| Michelle                          | Poe        |                       | PhD RN           | McGovern Medical School at The University of Texas Health Science Center at Houston | Houston, TX                              | assisted with patient enrollment and data collection    |                                                                                            |
| Kimberly                          | Rennie     |                       | PhD              | McGovern Medical School at The University of Texas Health Science Center at Houston | Houston, TX                              | assisted with patient enrollment and data collection    |                                                                                            |
| Shawna L                          | Rodgers    |                       | RNC-NIC BSN      | McGovern Medical School at The University of Texas Health Science Center at Houston | Houston, TX                              | assisted with patient enrollment and data collection    |                                                                                            |
| Saba Khan                         | Siddiki    |                       | MD               | McGovern Medical School at The University of Texas Health Science Center at Houston | Houston, TX                              | investigator                                            |                                                                                            |
| Daniel                            | Sperry     |                       | RN               | McGovern Medical School at The University of Texas Health Science Center at Houston | Houston, TX                              | assisted with patient enrollment and data collection    |                                                                                            |

## Supplemental Online Content: Nonauthor Collaborators

\*First name, last name, and suffix (if applicable) are required and will appear in PubMed.

| *First Name and Middle Initial(s) | *Last Name  | *Suffix (eg, Jr, III) | Academic Degrees | Institution                                                                         | Location (city, state/province, country) | Role or Contribution, eg, chair, principal investigator | Group (if more than 1 Group listed in the byline) and/or Subgroup (eg, Steering Committee) |  |
|-----------------------------------|-------------|-----------------------|------------------|-------------------------------------------------------------------------------------|------------------------------------------|---------------------------------------------------------|--------------------------------------------------------------------------------------------|--|
| Emily K                           | Stephens    |                       | RNC-NIC<br>BSN   | McGovern Medical School at The University of Texas Health Science Center at Houston | Houston, TX                              | assisted with patient enrollment and data collection    |                                                                                            |  |
| Patti L                           | Pierce Tate |                       | RCP              | McGovern Medical School at The University of Texas Health Science Center at Houston | Houston, TX                              | assisted with patient enrollment and data collection    |                                                                                            |  |
| Sharon L                          | Wright      |                       | MT (ASCP)        | University of Texas Health Science                                                  | Houston, TX                              | assisted with patient                                   |                                                                                            |  |
| Pablo J                           | Sanchez     |                       | MD               | Nationwide Children's Hospital                                                      | Columbus, OH                             | investigator                                            |                                                                                            |  |
| Leif D                            | Nelin       |                       | MD               | Nationwide Children's Hospital                                                      | Columbus, OH                             | investigator                                            |                                                                                            |  |
| Sudarshan R                       | Jadcherla   |                       | MD               | Nationwide Children's Hospital                                                      | Columbus, OH                             | investigator                                            |                                                                                            |  |
| Jonathan L                        | Slaughter   |                       | MD MPH           | Nationwide Children's Hospital                                                      | Columbus, OH                             | investigator                                            |                                                                                            |  |
| Patricia W                        | Luzader     |                       | RN               | Nationwide Children's Hospital                                                      | Columbus, OH                             | assisted with patient enrollment and data collection    |                                                                                            |  |
| Stephanie                         | Burkhardt   |                       | BS MPH           | Nationwide Children's Hospital                                                      | Columbus, OH                             | assisted with patient enrollment and data collection    |                                                                                            |  |
| Helen                             | Carey       |                       | PT DHSc<br>PCS   | Nationwide Children's Hospital                                                      | Columbus, OH                             | assisted with patient enrollment and data collection    |                                                                                            |  |
| Michelle                          | Chao        |                       | BS               | Nationwide Children's Hospital                                                      | Columbus, OH                             | assisted with patient enrollment and data collection    |                                                                                            |  |
| Erna                              | Clark       |                       | BA               | Nationwide Children's Hospital                                                      | Columbus, OH                             | assisted with patient enrollment and data collection    |                                                                                            |  |
| Erin                              | Fearns      |                       |                  | Nationwide Children's Hospital                                                      | Columbus, OH                             | assisted with patient enrollment and data collection    |                                                                                            |  |
| Christine A                       | Fortney     |                       | PhD RN           | Nationwide Children's Hospital                                                      | Columbus, OH                             | assisted with patient enrollment and data collection    |                                                                                            |  |

Supplemental Online Content: Nonauthor Collaborators

\*First name, last name, and suffix (if applicable) are required and will appear in PubMed.

| *First Name and Middle Initial(s) | *Last Name    | *Suffix (eg, Jr, III) | Academic Degrees | Institution                    | Location (city, state/province, country) | Role or Contribution, eg, chair, principal investigator | Group (if more than 1 Group listed in the byline) and/or Subgroup (eg, Steering Committee) |  |
|-----------------------------------|---------------|-----------------------|------------------|--------------------------------|------------------------------------------|---------------------------------------------------------|--------------------------------------------------------------------------------------------|--|
| Aubrey                            | Fowler        |                       | BS               | Nationwide Children's Hospital | Columbus, OH                             | assisted with patient enrollment and data collection    |                                                                                            |  |
| Jennifer                          | Grothouse     |                       | RN BSN           | Nationwide Children's Hospital | Columbus, OH                             | assisted with patient enrollment and data collection    |                                                                                            |  |
| Julie                             | Gutentag      |                       | RN BSN           | Nationwide Children's Hospital | Columbus, OH                             | assisted with patient enrollment and data collection    |                                                                                            |  |
| Cole                              | Hague         |                       | BA MS            | Nationwide Children's Hospital | Columbus, OH                             | assisted with patient enrollment and data collection    |                                                                                            |  |
| Jacqueline                        | McCool        |                       |                  | Nationwide Children's Hospital | Columbus, OH                             | assisted with patient enrollment and data collection    |                                                                                            |  |
| Mary Ann                          | Nelin         |                       | MD               | Nationwide Children's Hospital | Columbus, OH                             | investigator                                            |                                                                                            |  |
| Courtney                          | Park          |                       | RN BSN           | Nationwide Children's Hospital | Columbus, OH                             | assisted with patient enrollment and data collection    |                                                                                            |  |
| Lindsay                           | Pietruszewski |                       | PTN DPT          | Nationwide Children's Hospital | Columbus, OH                             | assisted with patient enrollment and data collection    |                                                                                            |  |
| Jessica                           | Purnell       |                       | BS CCRC          | Nationwide Children's Hospital | Columbus, OH                             | assisted with patient enrollment and data collection    |                                                                                            |  |
| Julie                             | Shadd         |                       | BS RD LD         | Nationwide Children's Hospital | Columbus, OH                             | assisted with patient enrollment and data collection    |                                                                                            |  |
| Kristi                            | Small         |                       | BS               | Nationwide Children's Hospital | Columbus, OH                             | assisted with patient enrollment and data collection    |                                                                                            |  |

Supplemental Online Content: Nonauthor Collaborators

\*First name, last name, and suffix (if applicable) are required and will appear in PubMed.

| *First Name and Middle Initial(s) | *Last Name     | *Suffix (eg, Jr, III) | Academic Degrees | Institution                    | Location (city, state/province, country) | Role or Contribution, eg, chair, principal investigator | Group (if more than 1 Group listed in the byline) and/or Subgroup (eg, Steering Committee) |  |
|-----------------------------------|----------------|-----------------------|------------------|--------------------------------|------------------------------------------|---------------------------------------------------------|--------------------------------------------------------------------------------------------|--|
| Melanie                           | Stein          |                       | RRT BBA          | Nationwide Children's Hospital | Columbus, OH                             | assisted with patient enrollment and data collection    |                                                                                            |  |
| Margaret                          | Sullivan       |                       | BS               | Nationwide Children's Hospital | Columbus, OH                             | assisted with patient enrollment and data collection    |                                                                                            |  |
| Rox Ann                           | Sullivan       |                       | RN BSN           | Nationwide Children's Hospital | Columbus, OH                             | assisted with patient enrollment and data collection    |                                                                                            |  |
| Christopher J                     | Timan          |                       | MD               | Nationwide Children's Hospital | Columbus, OH                             | investigator                                            |                                                                                            |  |
| Keith O                           | Yeates         |                       | MD PhD           | Nationwide Children's Hospital | Columbus, OH                             | investigator                                            |                                                                                            |  |
| Lina                              | Yoseff-Salameh |                       | MD               | Nationwide Children's Hospital | Columbus, OH                             | investigator                                            |                                                                                            |  |
| Sarah A                           | Keim           |                       | PhD              | Nationwide Children's Hospital | Columbus, OH                             | assisted with patient enrollment and data collection    |                                                                                            |  |
| Julia                             | Newton         |                       | MPH              | Nationwide Children's Hospital | Columbus, OH                             | assisted with patient enrollment and data collection    |                                                                                            |  |
| Katelyn                           | Levengood      |                       | PT DPT           | Nationwide Children's Hospital | Columbus, OH                             | assisted with patient enrollment and data collection    |                                                                                            |  |
| Nancy                             | Batterson      |                       | OT/L SCFES CLC   | Nationwide Children's Hospital | Columbus, OH                             | assisted with patient enrollment and data collection    |                                                                                            |  |
| Courtney                          | Rice           |                       | PsyD             | Nationwide Children's Hospital | Columbus, OH                             | assisted with patient enrollment and data collection    |                                                                                            |  |
| Mohannad                          | Moallem        |                       | MD               | Nationwide Children's Hospital | Columbus, OH                             | investigator                                            |                                                                                            |  |
| Nathalie L                        | Maitre         |                       | MD PhD           | Nationwide Children's Hospital | Columbus, OH                             | investigator                                            |                                                                                            |  |
| Heidi M                           | Harmon         |                       | MD MS            | Nationwide Children's Hospital | Columbus, OH                             | investigator                                            |                                                                                            |  |

## Supplemental Online Content: Nonauthor Collaborators

\*First name, last name, and suffix (if applicable) are required and will appear in PubMed.

| *First Name and Middle Initial(s) | *Last Name      | *Suffix (eg, Jr, III) | Academic Degrees | Institution       | Location (city, state/province, country) | Role or Contribution, eg, chair, principal investigator | Group (if more than 1 Group listed in the byline) and/or Subgroup (eg, Steering Committee) |  |
|-----------------------------------|-----------------|-----------------------|------------------|-------------------|------------------------------------------|---------------------------------------------------------|--------------------------------------------------------------------------------------------|--|
| Abhik                             | Das             |                       | PhD              | RTI International | Research Triangle Park, NC               | assisted with patient enrollment and data collection    |                                                                                            |  |
| Dennis                            | Wallace         |                       | PhD              | RTI International | Research Triangle Park, NC               | assisted with patient enrollment and data collection    |                                                                                            |  |
| Carla M                           | Banna           |                       | PhD              | RTI International | Research Triangle Park, NC               | assisted with patient enrollment and data collection    |                                                                                            |  |
| Marie G                           | Gantz           |                       | PhD              | RTI International | Research Triangle Park, NC               | assisted with patient enrollment and data collection    |                                                                                            |  |
| Jeanette                          | O'Donnell Auman |                       | BS               | RTI International | Research Triangle Park, NC               | assisted with patient enrollment and data collection    |                                                                                            |  |
| Margaret M                        | Crawford        |                       | BS CCRP          | RTI International | Research Triangle Park, NC               | assisted with patient enrollment and data collection    |                                                                                            |  |
| Jenna                             | Gabrio          |                       | MPH              | RTI International | Research Triangle Park, NC               | assisted with patient enrollment and data collection    |                                                                                            |  |
| David                             | Leblond         |                       | BS               | RTI International | Research Triangle Park, NC               | assisted with patient enrollment and data collection    |                                                                                            |  |
| Jamie E                           | Newman          |                       | PhD MPH          | RTI International | Research Triangle Park, NC               |                                                         |                                                                                            |  |
| Carolyn M                         | Petrie Huitema  |                       | MS CCRP          | RTI International | Research Triangle Park, NC               | assisted with patient enrollment and data collection    |                                                                                            |  |
| Annie                             | vonLehmden      |                       | BS               | RTI International | Research Triangle Park, NC               | assisted with patient enrollment and data collection    |                                                                                            |  |
| Kristin M                         | Zaterka-Baxter  |                       | RN BSN CCRP      | RTI International | Research Triangle Park, NC               | assisted with patient enrollment and data collection    |                                                                                            |  |
| Lei                               | Li              |                       | PhD              | RTI International | Research Triangle Park, NC               | assisted with patient enrollment and data collection    |                                                                                            |  |

## Supplemental Online Content: Nonauthor Collaborators

\*First name, last name, and suffix (if applicable) are required and will appear in PubMed.

| *First Name and Middle Initial(s) | *Last Name           | *Suffix (eg, Jr, III) | Academic Degrees | Institution                         | Location (city, state/province, country) | Role or Contribution, eg, chair, principal investigator | Group (if more than 1 Group listed in the byline) and/or Subgroup (eg, Steering Committee) |  |
|-----------------------------------|----------------------|-----------------------|------------------|-------------------------------------|------------------------------------------|---------------------------------------------------------|--------------------------------------------------------------------------------------------|--|
| Krisa P                           | Van Meurs            |                       | MD               | Stanford University                 | Stanford, CA                             | investigator                                            |                                                                                            |  |
| David K                           | Stevenson            |                       | MD               | Stanford University                 | Stanford, CA                             | investigator                                            |                                                                                            |  |
| Valerie Y                         | Chock                |                       | MD MS Epi        | Stanford University                 | Stanford, CA                             | investigator                                            |                                                                                            |  |
| M. Bethany                        | Ball                 |                       | BSc CCRC         | Stanford University                 | Stanford, CA                             | assisted with patient enrollment and data collection    |                                                                                            |  |
| Barbara                           | Bentley              |                       | PsychD<br>MSEd   | Stanford University                 | Stanford, CA                             | assisted with patient enrollment and data collection    |                                                                                            |  |
| Ritu                              | Chitkara             |                       | MD FAAP          | Stanford University                 | Stanford, CA                             | investigator                                            |                                                                                            |  |
| Alexis S                          | Davis                |                       | MD               | Stanford University                 | Stanford, CA                             | investigator                                            |                                                                                            |  |
| Maria Elena                       | DeAnda               |                       | PhD              | Stanford University                 | Stanford, CA                             | assisted with patient enrollment and data collection    |                                                                                            |  |
| Anne M                            | DeBattista           |                       | RN PNP-C<br>PhD  | Stanford University                 | Stanford, CA                             | assisted with patient enrollment and data collection    |                                                                                            |  |
| Beth                              | Earhart              |                       | PhD              | Stanford University                 | Stanford, CA                             | assisted with patient enrollment and data collection    |                                                                                            |  |
| Lynne C                           | Huffman              |                       | MD               | Stanford University                 | Stanford, CA                             | investigator                                            |                                                                                            |  |
| Casey E                           | Krueger              |                       | PhD              | Stanford University                 | Stanford, CA                             | assisted with patient enrollment and data collection    |                                                                                            |  |
| Ryan E                            | Lucash               |                       | PhD              | Stanford University                 | Stanford, CA                             | assisted with patient enrollment and data collection    |                                                                                            |  |
| Melinda S                         | Proud                |                       | RCP              | Stanford University                 | Stanford, CA                             | assisted with patient enrollment and data collection    |                                                                                            |  |
| Elizabeth N                       | Hitchner<br>Reichert |                       | MA CCRC          | Stanford University                 | Stanford, CA                             | assisted with patient enrollment and data collection    |                                                                                            |  |
| Dharshi                           | Sivakumar            |                       | MD               | Stanford University                 | Stanford, CA                             | investigator                                            |                                                                                            |  |
| Heather                           | Taylor               |                       | PhD              | Stanford University                 | Stanford, CA                             | assisted with patient enrollment and data collection    |                                                                                            |  |
| Hali E                            | Weiss                |                       | MD               | Stanford University                 | Stanford, CA                             | investigator                                            |                                                                                            |  |
| Myriam                            | Peralta-Carcelen     |                       | MD MPH           | University of Alabama at Birmingham | Birmingham, AL                           | investigator                                            |                                                                                            |  |
| Monica V                          | Collins              |                       | RN BSN           | University of Alabama at Birmingham | Birmingham, AL                           | assisted with patient enrollment and data collection    |                                                                                            |  |
| Shirley S                         | Cosby                |                       | RN BSN           | University of Alabama at Birmingham | Birmingham, AL                           | assisted with patient enrollment and data collection    |                                                                                            |  |
| Fred J                            | Biasini              |                       | PhD              | University of Alabama at Birmingham | Birmingham, AL                           | assisted with patient enrollment and data collection    |                                                                                            |  |
| Kristy A                          | Domnanovich          |                       | PhD              | University of Alabama at Birmingham | Birmingham, AL                           | assisted with patient enrollment and data collection    |                                                                                            |  |

## Supplemental Online Content: Nonauthor Collaborators

\*First name, last name, and suffix (if applicable) are required and will appear in PubMed.

| *First Name and Middle Initial(s) | *Last Name   | *Suffix (eg, Jr, III) | Academic Degrees  | Institution                            | Location (city, state/province, country) | Role or Contribution, eg, chair, principal investigator | Group (if more than 1 Group listed in the byline) and/or Subgroup (eg, Steering Committee) |  |
|-----------------------------------|--------------|-----------------------|-------------------|----------------------------------------|------------------------------------------|---------------------------------------------------------|--------------------------------------------------------------------------------------------|--|
| Tara E                            | McNair       |                       | RN BSN            | University of Alabama at Birmingham    | Birmingham, AL                           | assisted with patient enrollment and data collection    |                                                                                            |  |
| Vivien A                          | Phillips     |                       | RN BSN            | University of Alabama at Birmingham    | Birmingham, AL                           | assisted with patient enrollment and data collection    |                                                                                            |  |
| Sally                             | Whitley      |                       | MA OTR-L<br>FAOTA | University of Alabama at Birmingham    | Birmingham, AL                           | assisted with patient enrollment and data collection    |                                                                                            |  |
| Sheree                            | York Chapman |                       | PT DPT<br>PCS     | University of Alabama at Birmingham    | Birmingham, AL                           | assisted with patient enrollment and data collection    |                                                                                            |  |
| Uday                              | Devaskar     |                       | MD                | University of California - Los Angeles | Los Angeles, CA                          | investigator                                            |                                                                                            |  |
| Teresa                            | Chanlaw      |                       | MPH               | University of California - Los Angeles | Los Angeles, CA                          | assisted with patient enrollment and data collection    |                                                                                            |  |
| Rachel                            | Geller       |                       | RN BSN            | University of California - Los Angeles | Los Angeles, CA                          | assisted with patient enrollment and data collection    |                                                                                            |  |
| Meena                             | Garg         |                       | MD                | University of California - Los Angeles | Los Angeles, CA                          | investigator                                            |                                                                                            |  |
| Isabell B                         | Purdy        |                       | PhD CPNP          | University of California - Los Angeles | Los Angeles, CA                          | assisted with patient enrollment and data collection    |                                                                                            |  |
| Edward F                          | Bell         |                       | MD                | University of Iowa                     | Iowa City, IA                            | investigator                                            |                                                                                            |  |
| Tarah T                           | Colaizy      |                       | MD MPH            | University of Iowa                     | Iowa City, IA                            | investigator                                            |                                                                                            |  |
| John A                            | Widness      |                       | MD                | University of Iowa                     | Iowa City, IA                            | investigator                                            |                                                                                            |  |
| Jane E                            | Brumbaugh    |                       | MD                | University of Iowa                     | Iowa City, IA                            | investigator                                            |                                                                                            |  |
| Heidi M                           | Harmon       |                       | MD                | University of Iowa                     | Iowa City, IA                            | investigator                                            |                                                                                            |  |
| Karen J                           | Johnson      |                       | RN BSN            | University of Iowa                     | Iowa City, IA                            | assisted with patient enrollment and data collection    |                                                                                            |  |
| Jacky R                           | Walker       |                       | RN                | University of Iowa                     | Iowa City, IA                            | assisted with patient enrollment and data collection    |                                                                                            |  |
| Claire A                          | Goeke        |                       | RN                | University of Iowa                     | Iowa City, IA                            | assisted with patient enrollment and data collection    |                                                                                            |  |
| Mendi L                           | Schmelzel    |                       | MSN RN            | University of Iowa                     | Iowa City, IA                            | assisted with patient enrollment and data collection    |                                                                                            |  |
| Diane L                           | Eastman      |                       | RN CPNP<br>MA     | University of Iowa                     | Iowa City, IA                            | assisted with patient enrollment and data collection    |                                                                                            |  |
| Michelle L                        | Baack        |                       | MD                | University of Iowa                     | Iowa City, IA                            | investigator                                            |                                                                                            |  |
| Lauritz R                         | Meyer        |                       | MD                | University of Iowa                     | Iowa City, IA                            | investigator                                            |                                                                                            |  |
| Laurie A                          | Hogden       |                       | MD                | University of Iowa                     | Iowa City, IA                            | investigator                                            |                                                                                            |  |
| Megan M                           | Henning      |                       | RN                | University of Iowa                     | Iowa City, IA                            | assisted with patient enrollment and data collection    |                                                                                            |  |

## Supplemental Online Content: Nonauthor Collaborators

\*First name, last name, and suffix (if applicable) are required and will appear in PubMed.

| *First Name and Middle Initial(s) | *Last Name      | *Suffix (eg, Jr, III) | Academic Degrees | Institution                                     | Location (city, state/province, country) | Role or Contribution, eg, chair, principal investigator | Group (if more than 1 Group listed in the byline) and/or Subgroup (eg, Steering Committee) |  |
|-----------------------------------|-----------------|-----------------------|------------------|-------------------------------------------------|------------------------------------------|---------------------------------------------------------|--------------------------------------------------------------------------------------------|--|
| Chelsey                           | Elenkiwich      |                       | RN BSN           | University of Iowa                              | Iowa City, IA                            | assisted with patient enrollment and data collection    |                                                                                            |  |
| Megan                             | Broadbent       |                       | RN BSN           | University of Iowa                              | Iowa City, IA                            | assisted with patient enrollment and data collection    |                                                                                            |  |
| Sarah                             | Van Muyden      |                       | RN BSN           | University of Iowa                              | Iowa City, IA                            | assisted with patient enrollment and data collection    |                                                                                            |  |
| Dan L                             | Ellsbury        |                       | MD               | University of Iowa                              | Iowa City, IA                            | investigator                                            |                                                                                            |  |
| Donia B                           | Campbell        |                       | RNC-NIC          | University of Iowa                              | Iowa City, IA                            | assisted with patient enrollment and data collection    |                                                                                            |  |
| Tracy L                           | Tud             |                       | RN               | University of Iowa                              | Iowa City, IA                            | assisted with patient enrollment and data collection    |                                                                                            |  |
| Janell                            | Fuller          |                       | MD               | University of New Mexico Health Sciences Center | Albuquerque, NM                          | investigator                                            |                                                                                            |  |
| Sundquist                         | Beauman         |                       | MSN RNC          | University of New Mexico Health Sciences Center | Albuquerque, NM                          | assisted with patient enrollment and data collection    |                                                                                            |  |
| Conra                             | Backstrom Lacy  |                       | RN               | University of New Mexico Health Sciences Center | Albuquerque, NM                          | assisted with patient enrollment and data collection    |                                                                                            |  |
| Mary                              | Ruffiner Hanson |                       | RN BSN           | University of New Mexico Health Sciences Center | Albuquerque, NM                          | assisted with patient enrollment and data collection    |                                                                                            |  |
| Carol                             | Hartenberger    |                       | BSN MPH          | University of New Mexico Health Sciences Center | Albuquerque, NM                          | assisted with patient enrollment and data collection    |                                                                                            |  |
| Elizabeth                         | Kuan            |                       | RN BSN           | University of New Mexico Health Sciences Center | Albuquerque, NM                          | assisted with patient enrollment and data collection    |                                                                                            |  |
| Sandra Jean R.                    | Lowe            |                       | PhD              | University of New Mexico Health Sciences Center | Albuquerque, NM                          | assisted with patient enrollment and data collection    |                                                                                            |  |
| Gregory M                         | Sokol           |                       | MD               | Indiana University                              | Bloomington, IN                          | investigator                                            |                                                                                            |  |
| Lu Ann                            | Papile          |                       | MD               | Indiana University                              | Bloomington, IN                          | investigator                                            |                                                                                            |  |
| Heidi                             | Harmon          |                       | MD, MS           | Indiana University                              | Bloomington, IN                          | investigator                                            |                                                                                            |  |
| Abbey C                           | Hines           |                       | PsyD HSPP        | Indiana University                              | Bloomington, IN                          | assisted with patient enrollment and data collection    |                                                                                            |  |
| Carolyn                           | Lytle           |                       | MD MPH           | Indiana University                              | Bloomington, IN                          | investigator                                            |                                                                                            |  |
| Dianne E                          | Herron          |                       | RN CCRC          | Indiana University                              | Bloomington, IN                          | assisted with patient enrollment and data collection    |                                                                                            |  |
| Susan                             | Gunn            |                       | NNP-BC<br>CCRC   | Indiana University                              | Bloomington, IN                          | assisted with patient enrollment and data collection    |                                                                                            |  |
| Lucy                              | Smiley          |                       | CCRC             | Indiana University                              | Bloomington, IN                          | assisted with patient enrollment and data collection    |                                                                                            |  |
| Leslie                            | Dawn Wilson     |                       | BSN CCRC         | Indiana University                              | Bloomington, IN                          | assisted with patient enrollment and data collection    |                                                                                            |  |
| Sara B                            | DeMauro         |                       | MD MSCE          | University of Pennsylvania                      | Philadelphia, PA                         | investigator                                            |                                                                                            |  |



## Supplemental Online Content: Nonauthor Collaborators

\*First name, last name, and suffix (if applicable) are required and will appear in PubMed.

| *First Name and Middle Initial(s) | *Last Name        | *Suffix (eg, Jr, III) | Academic Degrees | Institution                | Location (city, state/province, country) | Role or Contribution, eg, chair, principal investigator | Group (if more than 1 Group listed in the byline) and/or Subgroup (eg, Steering Committee) |
|-----------------------------------|-------------------|-----------------------|------------------|----------------------------|------------------------------------------|---------------------------------------------------------|--------------------------------------------------------------------------------------------|
| Barbara                           | Schmidt           |                       | MD MSCE          | University of Pennsylvania | Philadelphia, PA                         | investigator                                            |                                                                                            |
| Eric C                            | Eichenwald        |                       | MD               | University of Pennsylvania | Philadelphia, PA                         | investigator                                            |                                                                                            |
| Haresh                            | Kirpalani         |                       | MD, MSc          | University of Pennsylvania | Philadelphia, PA                         | investigator                                            |                                                                                            |
| Sorava                            | Abbasi            |                       | MD               | University of Pennsylvania | Philadelphia, PA                         | investigator                                            |                                                                                            |
| Toni                              | Mancini           |                       | RN BSN<br>CCRC   | University of Pennsylvania | Philadelphia, PA                         | assisted with patient enrollment and data collection    |                                                                                            |
| Aasma S                           | Chaudhary         |                       | BS RRT           | University of Pennsylvania | Philadelphia, PA                         | assisted with patient enrollment and data collection    |                                                                                            |
| Dara M                            | Cucinotta         |                       | RN               | University of Pennsylvania | Philadelphia, PA                         | assisted with patient enrollment and data collection    |                                                                                            |
| Judy C                            | Bernbaum          |                       | MD               | University of Pennsylvania | Philadelphia, PA                         | investigator                                            |                                                                                            |
| Andrea                            | Freeman<br>Duncan |                       | MD               | University of Pennsylvania | Philadelphia, PA                         | investigator                                            |                                                                                            |
| Kevin                             | Dysart            |                       | MD               | University of Pennsylvania | Philadelphia, PA                         | investigator                                            |                                                                                            |
| Marsha                            | Gerdes            |                       | PhD              | University of Pennsylvania | Philadelphia, PA                         | assisted with patient enrollment and data collection    |                                                                                            |
| Hallam                            | Hurt              |                       | MD               | University of Pennsylvania | Philadelphia, PA                         | investigator                                            |                                                                                            |
| Jonathan                          | Snyder            |                       | RN BSN           | University of Pennsylvania | Philadelphia, PA                         | assisted with patient enrollment and data collection    |                                                                                            |
| Kristina                          | Ziolkowski        |                       |                  | University of Pennsylvania | Philadelphia, PA                         | assisted with patient enrollment and data collection    |                                                                                            |
| Carl T                            | D'Angio           |                       | MD               | University of Rochester    | Rochester, NY                            | investigator                                            |                                                                                            |
| Ronnie                            | Guillet           |                       | MD PhD           | University of Rochester    | Rochester, NY                            | investigator                                            |                                                                                            |
| Gary J                            | Myers             |                       | MD               | University of Rochester    | Rochester, NY                            | investigator                                            |                                                                                            |
| Kyle                              | Binion            |                       | BS               | University of Rochester    | Rochester, NY                            | assisted with patient enrollment and data collection    |                                                                                            |
| Patricia R                        | Chess             |                       | MD               | University of Rochester    | Rochester, NY                            | investigator                                            |                                                                                            |
| Caitlin                           | Fallone           |                       | MA               | University of Rochester    | Rochester, NY                            | assisted with patient enrollment and data collection    |                                                                                            |
| Osman                             | Farooq            |                       | MD               | University of Rochester    | Rochester, NY                            | investigator                                            |                                                                                            |
| Rosemary L Jensen                 |                   |                       |                  | University of Rochester    | Rochester, NY                            | assisted with patient enrollment and data collection    |                                                                                            |
| Alison                            | Kent              |                       | BMBS<br>FRACP MD | University of Rochester    | Rochester, NY                            | assisted with patient enrollment and data collection    |                                                                                            |
| Dee                               | Maffett           |                       | RN               | University of Rochester    | Rochester, NY                            | assisted with patient enrollment and data collection    |                                                                                            |
| Joan                              | Merzbach          |                       | LMSW             | University of Rochester    | Rochester, NY                            | assisted with patient enrollment and data collection    |                                                                                            |
| Constance                         | Orme              |                       |                  | University of Rochester    | Rochester, NY                            | assisted with patient enrollment and data collection    |                                                                                            |
| Michael G                         | Sacilowski        |                       | BS               | University of Rochester    | Rochester, NY                            | assisted with patient enrollment and data collection    |                                                                                            |
| Premini                           | Sabaratham        |                       | MPH              | University of Rochester    | Rochester, NY                            | assisted with patient enrollment and data collection    |                                                                                            |

## Supplemental Online Content: Nonauthor Collaborators

\*First name, last name, and suffix (if applicable) are required and will appear in PubMed.

| *First Name and Middle Initial(s) | *Last Name        | *Suffix (eg, Jr, III) | Academic Degrees | Institution                                     | Location (city, state/province, country) | Role or Contribution, eg, chair, principal investigator | Group (if more than 1 Group listed in the byline) and/or Subgroup (eg, Steering Committee) |
|-----------------------------------|-------------------|-----------------------|------------------|-------------------------------------------------|------------------------------------------|---------------------------------------------------------|--------------------------------------------------------------------------------------------|
| Ann Marie                         | Scorsone          |                       | MS CCRC          | University of Rochester                         | Rochester, NY                            | assisted with patient enrollment and data collection    |                                                                                            |
| Holly I M                         | Wadkins           |                       |                  | University of Rochester                         | Rochester, NY                            | assisted with patient enrollment and data collection    |                                                                                            |
| Karen                             | Wynn              |                       | RN               | University of Rochester                         | Rochester, NY                            | assisted with patient enrollment and data collection    |                                                                                            |
| Kelley                            | Yost              |                       | PhD              | University of Rochester                         | Rochester, NY                            | assisted with patient enrollment and data collection    |                                                                                            |
| Anne Marie                        | Reynolds          |                       | MD               | University of Rochester                         | Rochester, NY                            | investigator                                            |                                                                                            |
| Satyan                            | Lakshminrusimha   |                       | MD               | University of Rochester                         | Rochester, NY                            | investigator                                            |                                                                                            |
| Praveen                           | Chandrasekharan   |                       | MD               | University of Rochester                         | Rochester, NY                            | investigator                                            |                                                                                            |
| Stephanie                         | Guilford          |                       | BS               | University of Rochester                         | Rochester, NY                            | assisted with patient enrollment and data collection    |                                                                                            |
| Michelle E                        | Hartley-McAndrews |                       | MD               | University of Rochester                         | Rochester, NY                            | investigator                                            |                                                                                            |
| Ashley                            | Williams          |                       | MSEd             | University of Rochester                         | Rochester, NY                            | assisted with patient enrollment and data collection    |                                                                                            |
| William                           | Zorn              |                       | PhD              | University of Rochester                         | Rochester, NY                            | assisted with patient enrollment and data collection    |                                                                                            |
| Emily                             | Li                |                       | BA               | University of Rochester                         | Rochester, NY                            | assisted with patient enrollment and data collection    |                                                                                            |
| Jennifer                          | Donato            |                       | BS               | University of Rochester                         | Rochester, NY                            | assisted with patient enrollment and data collection    |                                                                                            |
| Kimberly G                        | McKee             |                       | BS               | University of Rochester                         | Rochester, NY                            | assisted with patient enrollment and data collection    |                                                                                            |
| Kelly R                           | Coleman           |                       | PsyD             | University of Rochester                         | Rochester, NY                            | assisted with patient enrollment and data collection    |                                                                                            |
| Stephen A                         | Bean              |                       | RPh              | University of Rochester                         | Rochester, NY                            | assisted with patient enrollment and data collection    |                                                                                            |
| Carol A                           | Coleman           |                       | RPh              | University of Rochester                         | Rochester, NY                            | assisted with patient enrollment and data collection    |                                                                                            |
| Cassandra A                       | Horihan           |                       | MS               | University of Rochester                         | Rochester, NY                            | assisted with patient enrollment and data collection    |                                                                                            |
| Myra H                            | Wyckoff           |                       | MD               | University of Texas Southwestern Medical Center | Dallas, TX                               | investigator                                            |                                                                                            |
| Luc P                             | Brion             |                       | MD               | University of Texas Southwestern Medical Center | Dallas, TX                               | investigator                                            |                                                                                            |
| Roy J                             | Heyne             |                       | MD               | University of Texas Southwestern Medical Center | Dallas, TX                               | investigator                                            |                                                                                            |
| Diana M                           | Vasil             |                       | MSN BSN RNC-NIC  | University of Texas Southwestern Medical Center | Dallas, TX                               | assisted with patient enrollment and data collection    |                                                                                            |
| Sally S                           | Adams             |                       | MS RN CPNP       | University of Texas Southwestern Medical Center | Dallas, TX                               | assisted with patient enrollment and data collection    |                                                                                            |
| Liun                              | Chen              |                       | RN PhD           | University of Texas Southwestern Medical Center | Dallas, TX                               | assisted with patient enrollment and data collection    |                                                                                            |

## Supplemental Online Content: Nonauthor Collaborators

\*First name, last name, and suffix (if applicable) are required and will appear in PubMed.

| *First Name and Middle Initial(s) | *Last Name      | *Suffix (eg, Jr, III) | Academic Degrees    | Institution                                     | Location (city, state/province, country) | Role or Contribution, eg, chair, principal investigator | Group (if more than 1 Group listed in the byline) and/or Subgroup (eg, Steering Committee) |  |
|-----------------------------------|-----------------|-----------------------|---------------------|-------------------------------------------------|------------------------------------------|---------------------------------------------------------|--------------------------------------------------------------------------------------------|--|
| Maria M                           | De Leon         |                       | RN BSN              | University of Texas Southwestern Medical Center | Dallas, TX                               | assisted with patient enrollment and data collection    |                                                                                            |  |
| Frances                           | Eubanks         |                       | RN BSN              | University of Texas Southwestern Medical Center | Dallas, TX                               | assisted with patient enrollment and data collection    |                                                                                            |  |
| Alicia                            | Guzman          |                       |                     | University of Texas Southwestern Medical Center | Dallas, TX                               | assisted with patient enrollment and data collection    |                                                                                            |  |
| Elizabeth                         | Heyne           |                       | PsyD PA-C           | University of Texas Southwestern Medical Center | Dallas, TX                               | assisted with patient enrollment and data collection    |                                                                                            |  |
| Lizette E                         | Lee             |                       | RN                  | University of Texas Southwestern Medical Center | Dallas, TX                               | assisted with patient enrollment and data collection    |                                                                                            |  |
| Linda A                           | Madden          |                       | BSN RN CPNP         | University of Texas Southwestern Medical Center | Dallas, TX                               | assisted with patient enrollment and data collection    |                                                                                            |  |
| E Rebecca                         | McDougald       |                       | MSN APRN CPNP-PC/AC | University of Texas Southwestern Medical Center | Dallas, TX                               | assisted with patient enrollment and data collection    |                                                                                            |  |
| Lara                              | Pavageau        |                       | MD                  | University of Texas Southwestern Medical Center | Dallas, TX                               | investigator                                            |                                                                                            |  |
| Pollicanna                        | Sepulveda       |                       | RN                  | University of Texas Southwestern Medical Center | Dallas, TX                               | assisted with patient enrollment and data collection    |                                                                                            |  |
| Cathy                             | Twell Boatman   |                       | MS CIMI             | University of Texas Southwestern Medical Center | Dallas, TX                               | assisted with patient enrollment and data collection    |                                                                                            |  |
| Kristine                          | Tolentino-Plata |                       | MS                  | University of Texas Southwestern Medical Center | Dallas, TX                               | assisted with patient enrollment and data collection    |                                                                                            |  |
| Azucena                           | Vera            |                       | AS                  | University of Texas Southwestern Medical Center | Dallas, TX                               | assisted with patient enrollment and data collection    |                                                                                            |  |
| Jillian                           | Waterbury       |                       | DNP RN CPNP-PC      | University of Texas Southwestern Medical Center | Dallas, TX                               | assisted with patient enrollment and data collection    |                                                                                            |  |
| Bradley A                         | Yoder           |                       | MD                  | University of Utah Medical Center               | Salt Lake City, UT                       | investigator                                            |                                                                                            |  |
| Robin K                           | Ohls            |                       | MD                  | University of Utah Medical Center               | Salt Lake City, UT                       | investigator                                            |                                                                                            |  |

## Supplemental Online Content: Nonauthor Collaborators

\*First name, last name, and suffix (if applicable) are required and will appear in PubMed.

| *First Name and Middle Initial(s) | *Last Name   | *Suffix (eg, Jr, III) | Academic Degrees | Institution                       | Location (city, state/province, country) | Role or Contribution, eg, chair, principal investigator | Group (if more than 1 Group listed in the byline) and/or Subgroup (eg, Steering Committee) |
|-----------------------------------|--------------|-----------------------|------------------|-----------------------------------|------------------------------------------|---------------------------------------------------------|--------------------------------------------------------------------------------------------|
| Mariana                           | Baserga      |                       | MD MSCI          | University of Utah Medical Center | Salt Lake City, UT                       | investigator                                            |                                                                                            |
| Sarah                             | Winter       |                       | MD               | University of Utah Medical Center | Salt Lake City, UT                       | investigator                                            |                                                                                            |
| Stephen D                         | Minton       |                       | MD               | University of Utah Medical Center | Salt Lake City, UT                       | investigator                                            |                                                                                            |
| Mark J                            | Sheffield    |                       | MD               | University of Utah Medical Center | Salt Lake City, UT                       | investigator                                            |                                                                                            |
| Carrie A                          | Rau          |                       | RN BSN<br>CCRC   | University of Utah Medical Center | Salt Lake City, UT                       | assisted with patient enrollment and data collection    |                                                                                            |
| Shawna                            | Baker        |                       | NR               | University of Utah Medical Center | Salt Lake City, UT                       | assisted with patient enrollment and data collection    |                                                                                            |
| Jill                              | Burnett      |                       | RNC BSN          | University of Utah Medical Center | Salt Lake City, UT                       | assisted with patient enrollment and data collection    |                                                                                            |
| Susan                             | Christensen  |                       | RN               | University of Utah Medical Center | Salt Lake City, UT                       | assisted with patient enrollment and data collection    |                                                                                            |
| Laura                             | Cole Bledsoe |                       | RN               | University of Utah Medical Center | Salt Lake City, UT                       | assisted with patient enrollment and data collection    |                                                                                            |
| Sean                              | Cunningham   |                       | PhD              | University of Utah Medical Center | Salt Lake City, UT                       | assisted with patient enrollment and data collection    |                                                                                            |
| Brandy                            | Davis        |                       | RN BSN           | University of Utah Medical Center | Salt Lake City, UT                       | assisted with patient enrollment and data collection    |                                                                                            |
| Jennifer O                        | Elmont       |                       | RN BSN           | University of Utah Medical Center | Salt Lake City, UT                       | assisted with patient enrollment and data collection    |                                                                                            |
| Becky                             | Hall         |                       | APRN             | University of Utah Medical Center | Salt Lake City, UT                       | assisted with patient enrollment and data collection    |                                                                                            |
| Manndi C                          | Loertscher   |                       | BS CCRP          | University of Utah Medical Center | Salt Lake City, UT                       | assisted with patient enrollment and data collection    |                                                                                            |
| Trisha                            | Marchant     |                       | RN               | University of Utah Medical Center | Salt Lake City, UT                       | assisted with patient enrollment and data collection    |                                                                                            |
| Earl                              | Maxon        |                       | RN CCRN          | University of Utah Medical Center | Salt Lake City, UT                       | assisted with patient enrollment and data collection    |                                                                                            |

## Supplemental Online Content: Nonauthor Collaborators

\*First name, last name, and suffix (if applicable) are required and will appear in PubMed.

| *First Name and Middle Initial(s) | *Last Name   | *Suffix (eg, Jr, III) | Academic Degrees | Institution                       | Location (city, state/province, country) | Role or Contribution, eg, chair, principal investigator | Group (if more than 1 Group listed in the byline) and/or Subgroup (eg, Steering Committee) |
|-----------------------------------|--------------|-----------------------|------------------|-----------------------------------|------------------------------------------|---------------------------------------------------------|--------------------------------------------------------------------------------------------|
| Kandace M                         | McGrath      |                       |                  | University of Utah Medical Center | Salt Lake City, UT                       | assisted with patient enrollment and data collection    |                                                                                            |
| Hena G                            | Mickelsen    |                       | BA               | University of Utah Medical Center | Salt Lake City, UT                       | assisted with patient enrollment and data collection    |                                                                                            |
| Galina                            | Morshedzadeh |                       | BSN APRN         | University of Utah Medical Center | Salt Lake City, UT                       | assisted with patient enrollment and data collection    |                                                                                            |
| D Melody                          | Parry        |                       | RN BSN           | University of Utah Medical Center | Salt Lake City, UT                       | assisted with patient enrollment and data collection    |                                                                                            |
| Brixen A                          | Reich        |                       | MSN RNC<br>CCRC  | University of Utah Medical Center | Salt Lake City, UT                       | assisted with patient enrollment and data collection    |                                                                                            |
| Susan T                           | Schaefer     |                       | RN BSN<br>RRT    | University of Utah Medical Center | Salt Lake City, UT                       | assisted with patient enrollment and data collection    |                                                                                            |
| Kelly                             | Stout        |                       | PhD              | University of Utah Medical Center | Salt Lake City, UT                       | assisted with patient enrollment and data collection    |                                                                                            |
| Ashley L                          | Stuart       |                       | PhD              | University of Utah Medical Center | Salt Lake City, UT                       | assisted with patient enrollment and data collection    |                                                                                            |
| Kimberlee                         | Weaver-Lewis |                       | RN MS            | University of Utah Medical Center | Salt Lake City, UT                       | assisted with patient enrollment and data collection    |                                                                                            |
| Kathryn D                         | Woodbury     |                       | RN BSN           | University of Utah Medical Center | Salt Lake City, UT                       | assisted with patient enrollment and data collection    |                                                                                            |
| Seetha                            | Shankaran    |                       | MD               | Wayne State University            | Detroit, MI                              | investigator                                            |                                                                                            |
| Sanjay                            | Chawla       |                       | MD               | Wayne State University            | Detroit, MI                              | investigator                                            |                                                                                            |
| Girija                            | Natarajan    |                       | MD               | Wayne State University            | Detroit, MI                              | investigator                                            |                                                                                            |
| Beena G                           | Sood         |                       | MD MS            | Wayne State University            | Detroit, MI                              | investigator                                            |                                                                                            |
| Rebecca                           | Bara         |                       | RN BSN           | Wayne State University            | Detroit, MI                              | assisted with patient enrollment and data collection    |                                                                                            |
| Prashant                          | Agarwal      |                       | MD               | Wayne State University            | Detroit, MI                              | investigator                                            |                                                                                            |
| Monika                            | Bajaj        |                       | MD               | Wayne State University            | Detroit, MI                              | investigator                                            |                                                                                            |
| Kirsten                           | Childs       |                       | RN BSN           | Wayne State University            | Detroit, MI                              | assisted with patient enrollment and data collection    |                                                                                            |
| Melissa                           | February     |                       | MD               | Wayne State University            | Detroit, MI                              | investigator                                            |                                                                                            |
| Laura                             | Goldston     |                       | MA               | Wayne State University            | Detroit, MI                              | assisted with patient enrollment and data collection    |                                                                                            |
| Mary E                            | Johnson      |                       | RN BSN           | Wayne State University            | Detroit, MI                              | assisted with patient enrollment and data collection    |                                                                                            |
| Bogdan                            | Panaiteacu   |                       | MD PhD           | Wayne State University            | Detroit, MI                              | investigator                                            |                                                                                            |
| Eunice                            | Hinz Woldt   |                       | RN MSN           | Wayne State University            | Detroit, MI                              | assisted with patient enrollment and data collection    |                                                                                            |

Supplemental Online Content: Nonauthor Collaborators

\*First name, last name, and suffix (if applicable) are required and will appear in PubMed.

| <b>*First Name and Middle Initial(s)</b> | <b>*Last Name</b> | <b>*Suffix (eg, Jr, III)</b> | Academic Degrees | Institution            | Location (city, state/province, country) | Role or Contribution, eg, chair, principal investigator | Group (if more than 1 Group listed in the byline) and/or Subgroup (eg, Steering Committee) |  |
|------------------------------------------|-------------------|------------------------------|------------------|------------------------|------------------------------------------|---------------------------------------------------------|--------------------------------------------------------------------------------------------|--|
| John                                     | Barks             |                              | MD               | Wayne State University | Detroit, MI                              | investigator                                            |                                                                                            |  |
| Martha                                   | Carlson           |                              | MD               | Wayne State University | Detroit, MI                              | investigator                                            |                                                                                            |  |
| Mary K                                   | Christensen       |                              | BA RRT           | Wayne State University | Detroit, MI                              | investigator                                            |                                                                                            |  |
| Diane F                                  | White             |                              | RRT CCRP         | Wayne State University | Detroit, MI                              | investigator                                            |                                                                                            |  |
| Stephanie A                              | Wiggins           |                              | MS               | Wayne State University | Detroit, MI                              | investigator                                            |                                                                                            |  |
